# Supplementary material for: Structural Brain Development and Depression Onset During Adolescence: A Prospective Longitudinal Study
Source: Atypon-hosted journal article supplement (doi:10.1176/appi.ajp.2013.13070920), 2014-02-28
Supplement: 564_ds001.pdf [file 564_ds001.pdf]

## Supplemental Data

### *Inter-scanner post-processing steps*

The stability of image acquisition in longitudinal and/or multi-site studies is critical but may be compromised in several ways, including instrument-related differences between sites, and instrument/software upgrades within sites (1). In the current study, steps were employed to address errors that are known to result from multi-site and/or longitudinal scanning (2). Firstly, images were corrected for tissue signal inhomogeneity, which has been shown to result from geometric distortion (2). This was achieved via a nonparametric non-uniformity intensity normalization method optimised for 3 Tesla images (3). Secondly, voxel dimension drift was corrected using linear registration procedures employed by the longitudinal processing stream in Freesurfer (Version 4.5) (<http://surfer.nmr.mgh.harvard.edu/fswiki/LongitudinalProcessing>), which involves the creation of an unbiased within-subject template space and average image using robust, inverse consistent registration (4).

### *Inter-scanner reliability and volume corrections*

To investigate the possibility of inter-scanner bias, and the need for further correction, four individuals were scanned on both scanner platforms within a three week period, using the same acquisition parameters as described for the study sample. Post-processing steps were applied to the resulting T1-weighted images, and regional volume and thickness measures were estimated, as described in the manuscript. Volume/thickness measures differed between scanners to a small degree (see Table S1); differences ranged from 0.07% (average whole brain gray matter thickness) to 7.5% (right pallidum). For some structures, BRI measures were larger, and for others, RCH measures were larger. It is of note that these differences are not notably different (and considerably lower in some cases) to those differences reported within-scanner (e.g., Jovicich et al. (5) reported amygdala differences of 6.1 to 8%, within-scanner). Reliability of measures from the two platforms was assessed via the calculation of intraclass correlation coefficients (ICC's). To compensate for the measurement discrepancies (see Table S1), and as per a recently suggested procedure for correcting inter-scanner differences (6), we derived a linear regression correction function (RCF) for each volume/thickness measure. The linear fit of BRI on RCH volume was computed and the slope and intercept were used to transform the BRI volume ( $\text{volume BRI}^{\text{RCF}} = [\text{volume BRI} - \text{intercept}]/\text{slope}$ ). Applying this correction improved ICC's for left and right hippocampus, left and right amygdala, left and right nucleus accumbens, left and right pallidum, left and right caudate, whole brain volume, right dorsolateral prefrontal cortex, right ventrolateral prefrontal cortex, left orbitofrontal cortex, and average whole brain thickness. These improvements, which were modest to strong, contribute to the removal of linear, systematic inter-scanner variation in ROI volumes, and it is likely that any remaining variation between volumes or thickness estimates from the two scanners, while creating noise, would not interact with Group.

Thus, we applied this same formula to the raw BRI (i.e., baseline) volume and thickness measures mentioned above, for our whole sample.

TABLE S1. Interscanner statistics (percentage difference, intraclass correlation coefficients before and after linear correction) for all region of interest thickness/volumetric estimates

| Region            | BRI>RCH % | ICC before correction | ICC after correction |
|-------------------|-----------|-----------------------|----------------------|
| average thickness | 0.07      | 0.79                  | 0.78                 |
| LACC              | 0.6       | 0.82                  | 0.82                 |
| RACC              | 0.6       | 0.41                  | 0.30                 |
| LdIPFC            | 0.9       | 0.93                  | 0.93                 |
| RdIPFC            | -0.9      | 0.69                  | 0.80                 |
| LvlPFC            | 1.2       | 0.81                  | 0.81                 |
| RvlPFC            | -1.3      | 0.80                  | 0.83                 |
| Lofc              | 3.9       | 0.83                  | 0.98                 |
| Rofc              | 1.5       | 0.29                  | 0.24                 |
| WBV               | -2.3      | 0.97                  | 0.99                 |
| Lamyg             | 2.7       | 0.89                  | 0.98                 |
| Ramyg             | -3.3      | 0.78                  | 0.92                 |
| LHipp             | 1.6       | 0.68                  | 0.78                 |
| RHipp             | -1.2      | 0.61                  | 0.73                 |
| LNacc             | -3.6      | 0.97                  | 0.98                 |
| RNacc             | 4.5       | 0.75                  | 0.86                 |
| LPut              | -0.5      | 0.95                  | 0.95                 |
| RPut              | 3.5       | 0.86                  | 0.87                 |
| LPal              | -3.0      | 0.89                  | 0.91                 |
| RPal              | -7.5      | 0.67                  | 0.81                 |
| LCaud             | 0.7       | 0.28                  | 0.74                 |
| RCaud             | -0.5      | 0.26                  | 0.99                 |

### *Creation of prefrontal cortical regions*

A customized anterior cingulate cortex region was created by combining the rostral and caudal anterior cingulate labels defined by FreeSurfer's automated cortical parcellation procedure. An orbitofrontal cortex region was created by combining lateral and medial orbitofrontal labels. A dorsolateral prefrontal cortex region was created by combining the superior frontal, rostral middle frontal and caudal middle frontal gyri, while the ventrolateral prefrontal cortex region was created by combining the pars opercularis, pars triangularis and pars orbitalis labels. A coronal cut was applied at Talairach coordinate y=26 to these two latter regions so that only *prefrontal* regions were included. In addition, another cut was made along the superior edge of medial wall of the brain for the dorsolateral prefrontal region, in order to exclude the medial surface of the brain.

*Descriptive statistics*

Means and standard deviations of all region of interest volume and thickness estimates (corrected for interscanner bias) are presented in Tables S2 and S3, respectively. Pearson's bivariate correlations between continuous selection variables (i.e., affective temperament), demographic variables and covariates are reported in Table S4. Tables S5 and S6 show Pearson's correlations between the aforementioned continuous variables and prefrontal cortical thickness estimates, and limbic/striatal volume estimates, respectively.

TABLE S2. Means and standard deviations of region of interest volume estimates (corrected for interscanner bias)

| Region | T1      |                | T2      |                |
|--------|---------|----------------|---------|----------------|
|        | Mean    | Std. Deviation | Mean    | Std. Deviation |
| R_hipp | 4608.42 | 245.92         | 4716.70 | 382.74         |
| L_hipp | 4069.37 | 665.93         | 4570.11 | 373.11         |
| R_amyg | 1583.16 | 382.14         | 1676.27 | 174.32         |
| L_amyg | 1414.86 | 295.88         | 1697.49 | 194.91         |
| R_caud | 5057.62 | 748.36         | 4307.85 | 494.85         |
| L_caud | 4165.18 | 106.71         | 4290.55 | 478.20         |
| R_puta | 7193.00 | 746.28         | 7228.26 | 692.28         |
| L_puta | 7468.95 | 609.41         | 7149.13 | 608.50         |
| R_pall | 2427.64 | 504.87         | 2024.05 | 232.45         |
| L_pall | 2265.11 | 248.57         | 2374.01 | 275.76         |
| R_nacc | 687.53  | 93.44          | 680.61  | 85.43          |
| L_nacc | 523.07  | 93.63          | 535.76  | 84.40          |

R = right, L = left, hipp = hippocampus, amyg = amygdala, caud = caudate, puta = putamen, pall = pallidum, nacc = nucleus accumbens, T1 = Time 1 (baseline), T2 = Time 2 (follow-up).

TABLE S3. Means and standard deviations of region of interest thickness estimates (corrected for interscanner bias)

| Region  | T1   |      | T2   |      |
|---------|------|------|------|------|
|         | Mean | SD   | Mean | SD   |
| R_vlPFC | 3.15 | 0.17 | 3.03 | 0.14 |
| L_vlPFC | 3.14 | 0.22 | 2.82 | 0.15 |
| R_dIPFC | 3.04 | 0.14 | 2.98 | 0.14 |
| L_dIPFC | 3.00 | 0.15 | 2.92 | 0.14 |
| R_OFC   | 3.00 | 0.07 | 2.86 | 0.10 |
| L_OFC   | 3.07 | 0.10 | 2.77 | 0.13 |
| R_ACC   | 3.23 | 0.23 | 3.15 | 0.21 |
| L_ACC   | 3.27 | 0.23 | 3.22 | 0.22 |

R = right, L = left, vlPFC = ventrolateral prefrontal cortex, dIPFC = dorsolateral prefrontal cortex, OFC = orbitofrontal cortex, ACC = anterior cingulate cortex, T1 = Time 1 (baseline), T2 = Time 2 (follow-up).

TABLE S4. Pearson's bivariate correlations between continuous selection variables (i.e., affective temperament), demographic variables and covariates

|              |          | Age at T1 | Time T1-T2 | CESD  | BAI           | CBCL          | SES   | FSIQ          | Tanner stage  | EC             | NA             |
|--------------|----------|-----------|------------|-------|---------------|---------------|-------|---------------|---------------|----------------|----------------|
| Age at T1    | <i>r</i> | 1         | .063       | -.154 | -.158         | <b>-.253*</b> | -.069 | <b>-.259*</b> | .101          | .108           | -.198          |
|              | <i>p</i> |           | .562       | .156  | .146          | .019          | .527  | .016          | .354          | .323           | .069           |
| Time T1-T2   | <i>r</i> |           | 1          | .119  | .144          | .011          | .055  | .038          | <b>.280**</b> | -.016          | .096           |
|              | <i>p</i> |           |            | .277  | .187          | .922          | .616  | .730          | .009          | .886           | .382           |
| CESD         | <i>r</i> |           |            | 1     | <b>.583**</b> | <b>.343**</b> | -.083 | -.022         | <b>.214*</b>  | <b>-.583**</b> | <b>.438**</b>  |
|              | <i>p</i> |           |            |       | .000          | .001          | .445  | .841          | .048          | .000           | .000           |
| BAI          | <i>r</i> |           |            |       | 1             | <b>.234*</b>  | -.011 | .034          | <b>.253*</b>  | <b>-.410**</b> | <b>.476**</b>  |
|              | <i>p</i> |           |            |       |               | .030          | .918  | .755          | .019          | .000           | .000           |
| CBCL         | <i>r</i> |           |            |       |               | 1             | -.001 | -.068         | -.062         | <b>-.472**</b> | <b>.363**</b>  |
|              | <i>p</i> |           |            |       |               |               | .989  | .531          | .573          | .000           | .001           |
| SES          | <i>r</i> |           |            |       |               |               | 1     | .097          | -.047         | -.031          | .043           |
|              | <i>p</i> |           |            |       |               |               |       | .372          | .667          | .775           | .696           |
| FSIQ         | <i>r</i> |           |            |       |               |               |       | 1             | -.167         | .162           | .063           |
|              | <i>p</i> |           |            |       |               |               |       |               | .125          | .140           | .564           |
| Tanner stage | <i>r</i> |           |            |       |               |               |       |               | 1             | -.019          | .041           |
|              | <i>p</i> |           |            |       |               |               |       |               |               | .865           | .708           |
| EC           | <i>r</i> |           |            |       |               |               |       |               |               | 1              | <b>-.591**</b> |
|              | <i>p</i> |           |            |       |               |               |       |               |               |                | .000           |
| NA           | <i>r</i> |           |            |       |               |               |       |               |               |                | 1              |
|              | <i>p</i> |           |            |       |               |               |       |               |               |                |                |

\*\* Correlation is significant at the 0.01 level (2-tailed), \*.Correlation is significant at the 0.05 level (2-tailed). Significant correlations are highlighted in bold.

T1 = Time 1 (baseline), T2 = Time 2 (follow-up), CESD = Centre for Epidemiological Studies - Depression scale, BAI = Beck Anxiety Inventory, CBCL - Child Behavior Checklist - parent report (externalizing), SES = socioeconomic status, FSIQ = full scale intelligence quotient, EC = Effortful Control, NA = Negative Affectivity.

TABLE S5. Pearson's bivariate correlations between continuous variables and limbic/striatal volumetric estimates

|           |          | Age at T1     | Time T1-T2 | CESD  | BAI   | CBCL           | SES   | FSIQ          | Tanner stage | EC           | NA    |
|-----------|----------|---------------|------------|-------|-------|----------------|-------|---------------|--------------|--------------|-------|
| R_hipp_T1 | <i>r</i> | .200          | .055       | .165  | .186  | .144           | -.005 | -.190         | .188         | -.089        | -.020 |
|           | <i>p</i> | .065          | .618       | .129  | .087  | .187           | .964  | .079          | .083         | .417         | .856  |
| L_hipp_T1 | <i>r</i> | .196          | .108       | .040  | .185  | .107           | .007  | <b>-.235*</b> | .186         | -.058        | .011  |
|           | <i>p</i> | .070          | .320       | .716  | .089  | .327           | .949  | .029          | .086         | .599         | .918  |
| R_hipp_T2 | <i>r</i> | .194          | .035       | .097  | .120  | .034           | -.061 | <b>-.221*</b> | .166         | -.012        | -.039 |
|           | <i>p</i> | .074          | .751       | .376  | .270  | .758           | .579  | .041          | .126         | .913         | .723  |
| L_hipp_T2 | <i>r</i> | <b>.279**</b> | .076       | -.098 | .064  | .002           | .015  | -.186         | .199         | .059         | -.154 |
|           | <i>p</i> | .009          | .485       | .368  | .558  | .989           | .891  | .086          | .067         | .589         | .161  |
| R_amyg_T1 | <i>r</i> | .030          | .020       | .066  | .152  | .120           | -.176 | -.120         | .038         | .071         | .095  |
|           | <i>p</i> | .782          | .858       | .546  | .162  | .272           | .105  | .271          | .727         | .519         | .387  |
| L_amyg_T1 | <i>r</i> | .114          | -.112      | -.035 | .127  | .109           | -.117 | -.006         | -.107        | .147         | .052  |
|           | <i>p</i> | .297          | .305       | .749  | .245  | .316           | .284  | .959          | .325         | .178         | .633  |
| R_amyg_T2 | <i>r</i> | .074          | .047       | -.066 | .020  | -.033          | -.033 | -.041         | .113         | .152         | -.004 |
|           | <i>p</i> | .498          | .668       | .543  | .855  | .764           | .761  | .711          | .301         | .165         | .968  |
| L_amyg_T2 | <i>r</i> | .033          | -.024      | -.023 | .112  | .011           | -.077 | -.054         | -.090        | <b>.247*</b> | .084  |
|           | <i>p</i> | .760          | .829       | .833  | .307  | .922           | .479  | .620          | .408         | .023         | .442  |
| R_caud_T1 | <i>r</i> | .210          | .041       | -.124 | .063  | <b>-.303**</b> | .011  | -.147         | .086         | .185         | -.081 |
|           | <i>p</i> | .053          | .710       | .255  | .562  | .005           | .920  | .176          | .431         | .089         | .463  |
| L_caud_T1 | <i>r</i> | <b>.253*</b>  | .092       | -.169 | .034  | <b>-.326**</b> | .090  | -.098         | .144         | .192         | -.134 |
|           | <i>p</i> | .019          | .401       | .120  | .753  | .002           | .407  | .368          | .187         | .079         | .221  |
| R_caud_T2 | <i>r</i> | <b>.243*</b>  | .025       | -.050 | .026  | <b>-.318**</b> | .025  | -.134         | .114         | .124         | -.110 |
|           | <i>p</i> | .024          | .820       | .648  | .813  | .003           | .816  | .218          | .297         | .259         | .318  |
| L_caud_T2 | <i>r</i> | .211          | .047       | -.113 | .029  | <b>-.324**</b> | .078  | -.106         | .157         | .166         | -.122 |
|           | <i>p</i> | .051          | .667       | .300  | .789  | .002           | .476  | .332          | .149         | .129         | .265  |
| R_puta_T1 | <i>r</i> | .135          | -.002      | -.039 | -.119 | -.184          | -.125 | -.054         | .080         | <b>.267*</b> | -.037 |
|           | <i>p</i> | .214          | .986       | .720  | .275  | .090           | .252  | .620          | .466         | .013         | .737  |
| L_puta_T1 | <i>r</i> | .130          | .058       | -.057 | .004  | -.169          | -.124 | -.073         | .104         | <b>.277*</b> | .024  |
|           | <i>p</i> | .232          | .599       | .602  | .970  | .119           | .256  | .506          | .340         | .010         | .829  |

|           |          |       |       |       |       |       |                |       |       |               |               |
|-----------|----------|-------|-------|-------|-------|-------|----------------|-------|-------|---------------|---------------|
| R_puta_T2 | <i>r</i> | .118  | -.005 | -.027 | -.159 | -.141 | -.092          | -.050 | .043  | <b>.284**</b> | -.034         |
|           | <i>p</i> | .278  | .960  | .803  | .143  | .197  | .399           | .645  | .695  | .008          | .760          |
| L_puta_T2 | <i>r</i> | .098  | .030  | -.022 | -.050 | -.136 | -.172          | -.054 | .083  | <b>.314**</b> | .024          |
|           | <i>p</i> | .368  | .787  | .839  | .651  | .213  | .112           | .622  | .446  | .003          | .828          |
| R_pall_T1 | <i>r</i> | .067  | -.019 | .051  | .163  | -.009 | -.043          | -.071 | .171  | -.173         | .140          |
|           | <i>p</i> | .542  | .859  | .641  | .133  | .931  | .695           | .513  | .115  | .113          | .201          |
| L_pall_T1 | <i>r</i> | .189  | .201  | .058  | .046  | -.035 | -.166          | -.027 | .204  | -.023         | .157          |
|           | <i>p</i> | .081  | .064  | .597  | .671  | .746  | .127           | .803  | .060  | .837          | .151          |
| R_pall_T2 | <i>r</i> | .042  | .095  | .040  | .075  | -.047 | -.058          | .011  | .071  | -.203         | .152          |
|           | <i>p</i> | .702  | .386  | .714  | .495  | .664  | .597           | .917  | .515  | .062          | .165          |
| L_pall_T2 | <i>r</i> | .191  | .190  | .017  | -.044 | -.057 | -.185          | -.094 | .110  | .011          | .069          |
|           | <i>p</i> | .079  | .079  | .879  | .688  | .604  | .087           | .391  | .313  | .919          | .532          |
| R_nacc_T1 | <i>r</i> | .129  | .069  | .039  | -.114 | -.172 | -.127          | -.129 | .132  | .128          | -.133         |
|           | <i>p</i> | .236  | .526  | .723  | .296  | .113  | .244           | .238  | .226  | .242          | .223          |
| L_nacc_T1 | <i>r</i> | .157  | .012  | -.048 | -.077 | -.136 | -.153          | .076  | -.014 | .088          | -.067         |
|           | <i>p</i> | .148  | .916  | .664  | .479  | .213  | .160           | .486  | .900  | .422          | .544          |
| R_nacc_T2 | <i>r</i> | .058  | -.094 | .019  | -.175 | -.097 | <b>-.214*</b>  | -.105 | .070  | .173          | -.203         |
|           | <i>p</i> | .597  | .387  | .863  | .107  | .372  | .048           | .335  | .522  | .113          | .062          |
| L_nacc_T2 | <i>r</i> | -.021 | -.132 | .003  | -.115 | -.113 | <b>-.343**</b> | .002  | -.082 | .144          | <b>-.225*</b> |
|           | <i>p</i> | .849  | .224  | .977  | .291  | .299  | .001           | .984  | .450  | .188          | .038          |

\*\* Correlation is significant at the 0.01 level (2-tailed), \*.Correlation is significant at the 0.05 level (2-tailed). Significant correlations are highlighted in bold.

R = right, L = left, hipp = hippocampus, amyg = amygdala, caud = caudate, puta = putamen, pall = pallidum, nacc = nucleus accumbens, T1 = Time 1 (baseline), T2 = Time 2 (follow-up), CESD = Centre for Epidemiological Studies - Depression scale, BAI = Beck Anxiety Inventory, CBCL - Child Behavior Checklist - parent report (externalizing), SES = socioeconomic status, FSIQ = full scale intelligence quotient, EC = Effortful Control, NA = Negative Affectivity.

TABLE S6. Pearson's bivariate correlations between continuous variables and prefrontal thickness estimates

|            |          | Age at T1     | Time T1-T2   | CESD          | BAI            | CBCL  | SES   | FSIQ          | Tanner stage | EC    | NA    |
|------------|----------|---------------|--------------|---------------|----------------|-------|-------|---------------|--------------|-------|-------|
| R_vIPFC_T1 | <i>r</i> | -.175         | .024         | <b>.267*</b>  | <b>.261*</b>   | .144  | .136  | .060          | .136         | -.119 | .228* |
|            | <i>p</i> | .107          | .823         | .013          | .015           | .186  | .212  | .585          | .212         | .276  | .036  |
| L_vIPFC_T1 | <i>r</i> | .030          | .054         | -.118         | -.095          | -.138 | -.059 | -.061         | -.143        | .139  | .048  |
|            | <i>p</i> | .785          | .620         | .279          | .385           | .205  | .591  | .574          | .191         | .204  | .661  |
| R_vIPFC_T2 | <i>r</i> | -.235*        | -.156        | .053          | -.022          | .040  | .083  | .144          | -.203        | .150  | -.027 |
|            | <i>p</i> | .030          | .151         | .628          | .841           | .715  | .447  | .185          | .060         | .170  | .806  |
| L_vIPFC_T2 | <i>r</i> | .077          | .161         | -.059         | .085           | .029  | .208  | <b>-.253*</b> | .137         | -.157 | .175  |
|            | <i>p</i> | .480          | .138         | .587          | .438           | .789  | .055  | .019          | .210         | .152  | .110  |
| R_dIPFC_T1 | <i>r</i> | .029          | .038         | -.156         | -.197          | .055  | .000  | .036          | .019         | .127  | -.132 |
|            | <i>p</i> | .788          | .730         | .151          | .070           | .613  | 1.000 | .741          | .865         | .246  | .230  |
| L_dIPFC_T1 | <i>r</i> | -.108         | -.045        | -.126         | -.135          | .102  | -.026 | .022          | -.119        | .228* | -.006 |
|            | <i>p</i> | .323          | .681         | .248          | .215           | .349  | .815  | .842          | .277         | .036  | .954  |
| R_dIPFC_T2 | <i>r</i> | -.143         | .061         | -.102         | <b>-.296**</b> | .050  | .057  | .033          | -.174        | .192  | -.155 |
|            | <i>p</i> | .191          | .574         | .352          | .006           | .646  | .603  | .764          | .109         | .078  | .157  |
| L_dIPFC_T2 | <i>r</i> | .176          | <b>.219*</b> | <b>-.214*</b> | -.099          | .041  | .102  | <b>-.249*</b> | .112         | .058  | -.051 |
|            | <i>p</i> | .105          | .042         | .048          | .364           | .708  | .352  | .021          | .302         | .600  | .643  |
| R_OFC_T1   | <i>r</i> | .116          | .125         | -.087         | -.081          | -.021 | -.140 | .033          | -.008        | .042  | .015  |
|            | <i>p</i> | .288          | .253         | .426          | .457           | .846  | .197  | .759          | .940         | .704  | .892  |
| L_OFC_T1   | <i>r</i> | .103          | .028         | .127          | .136           | -.117 | -.089 | -.015         | -.037        | .059  | .017  |
|            | <i>p</i> | .347          | .800         | .242          | .212           | .285  | .417  | .891          | .735         | .589  | .877  |
| R_OFC_T2   | <i>r</i> | -.041         | .210         | -.019         | -.057          | -.077 | -.122 | .143          | -.033        | -.002 | .093  |
|            | <i>p</i> | .711          | .052         | .859          | .604           | .479  | .264  | .190          | .760         | .983  | .395  |
| L_OFC_T2   | <i>r</i> | .050          | <b>.224*</b> | -.002         | .108           | .041  | .039  | .016          | -.026        | -.149 | .116  |
|            | <i>p</i> | .649          | .038         | .985          | .321           | .705  | .723  | .883          | .813         | .174  | .289  |
| R_ACC_T1   | <i>r</i> | <b>.283**</b> | .118         | .095          | .129           | .017  | -.064 | <b>-.220*</b> | .121         | .040  | -.066 |
|            | <i>p</i> | .008          | .277         | .386          | .235           | .878  | .561  | .042          | .266         | .714  | .550  |
| L_ACC_T1   | <i>r</i> | -.054         | -.036        | -.045         | .076           | .001  | -.015 | -.050         | -.010        | -.062 | .151  |
|            | <i>p</i> | .621          | .741         | .684          | .488           | .992  | .888  | .650          | .925         | .575  | .167  |

|          |          |       |      |      |      |       |       |       |      |       |       |
|----------|----------|-------|------|------|------|-------|-------|-------|------|-------|-------|
| R_ACC_T2 | <i>r</i> | .148  | .156 | .133 | .147 | -.117 | .015  | -.129 | .100 | .015  | -.077 |
|          | <i>p</i> | .174  | .152 | .221 | .178 | .284  | .894  | .236  | .358 | .889  | .486  |
| L_ACC_T2 | <i>r</i> | -.098 | .085 | .052 | .048 | -.040 | -.025 | -.072 | .063 | -.207 | .111  |
|          | <i>p</i> | .370  | .437 | .636 | .658 | .714  | .821  | .512  | .566 | .057  | .311  |

\*\* Correlation is significant at the 0.01 level (2-tailed), \*.Correlation is significant at the 0.05 level (2-tailed). Significant correlations are highlighted in bold.

R = right, L = left, vlPFC = ventrolateral prefrontal cortex, dlPFC = dorsolateral prefrontal cortex, OFC = orbitofrontal cortex, ACC = anterior cingulate cortex, T1 = Time 1 (baseline), T2 = Time 2 (follow-up), CESD = Centre for Epidemiological Studies - Depression scale, BAI = Beck Anxiety Inventory, CBCL - Child Behavior Checklist - parent report (externalizing), SES = socioeconomic status, FSIQ = full scale intelligence quotient, EC = Effortful Control, NA = Negative Affectivity.



## References

1. Han X, Jovicich J, Salat D, van der Kouwe A, Quinn B, Czanner S, et al. (2006): Reliability of MRI-derived measurements of human cerebral cortical thickness: The effects of field strength, scanner upgrade and manufacturer. *Neuroimage*. 32:180-194.
2. Wang D, Doddrell DM (2005): Geometric Distortion in Structural Magnetic Resonance Imaging. *Current Medical Imaging Reviews*. 1:49-60.
3. Zheng W, Chee MWL, Zagorodnov V (2009): Improvement of brain segmentation accuracy by optimizing non-uniformity correction using N3. *Neuroimage*. 48:73-83.
4. Reuter M, Rosas HD, Fischl B (2010): Highly accurate inverse consistent registration: A robust approach. *Neuroimage*. 53:1181-1196.
5. Jovicich J, Czanner S, Han X, Salat D, van der Kouwe A, Quinn B, et al. (2009): MRI-derived measurements of human subcortical, ventricular and intracranial brain volumes: Reliability effects of scan sessions, acquisition sequences, data analyses, scanner upgrade, scanner vendors and field strengths. *Neuroimage*. 46:177-192.
6. Pfefferbaum A, Rohlfing T, Rosenbloom MJ, Sullivan EV (2012): Combining atlas-based parcellation of regional brain data acquired across scanners at 1.5 T and 3.0 T field strengths. *Neuroimage*. 60:940-951.
